# Supplementary material for: Technical note: Pondi – a low-cost logger for long-term monitoring of methane, carbon dioxide, and nitrous oxide in aquatic and terrestrial systems
Source: Copernicus journal article supplement (doi:10.5194/bg-22-5051-2025), 2025-09-29
Supplement: Supplementary file 1 [file bg-22-5051-2025-supplement.pdf]

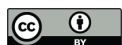

## *Supplement of*

# **Technical note: Pondi – a low-cost logger for long-term monitoring of methane, carbon dioxide, and nitrous oxide in aquatic and terrestrial systems**

**Martino E. Malerba et al.**

*Correspondence to:* Martino E. Malerba ([martino.malerba@rmit.edu.au](mailto:martino.malerba@rmit.edu.au))

The copyright of individual parts of the supplement might differ from the article licence.

## S1. Supplementary information

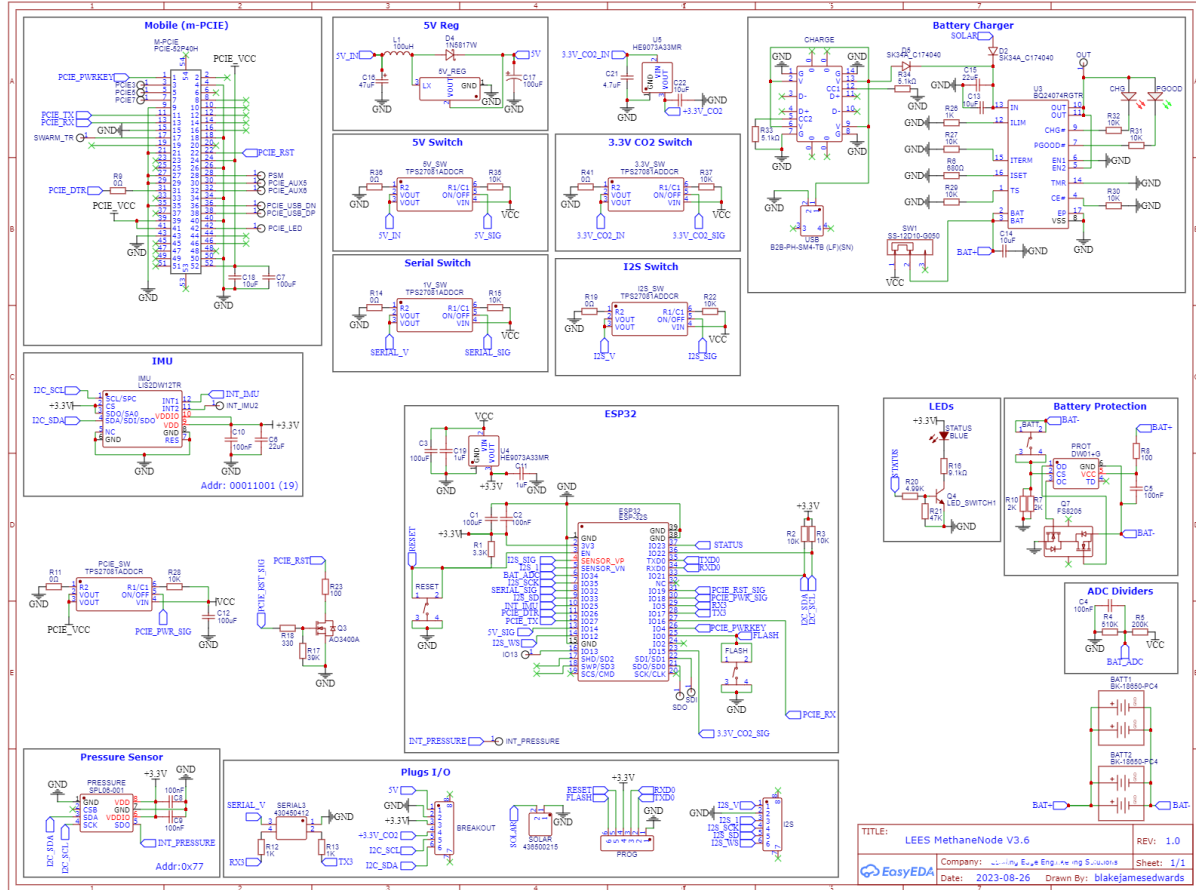

**Figure S1:** Electrical Schematic of the main *Pondi* PCB. To be used in conjunction with the Breakout PCB (see Fig. S2), connected via the 6-pin 'BREAKOUT' socket shown here.

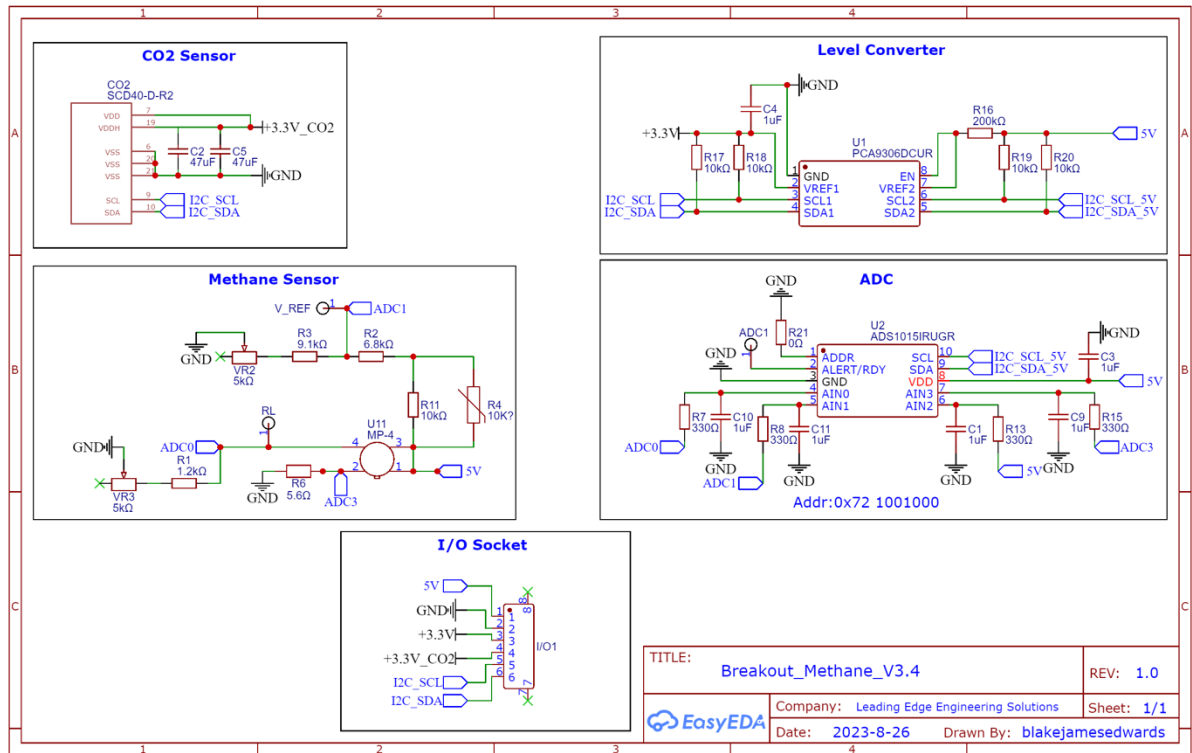

**Figure S2:** Electrical Schematic of the Breakout PCB located inside the chamber space.

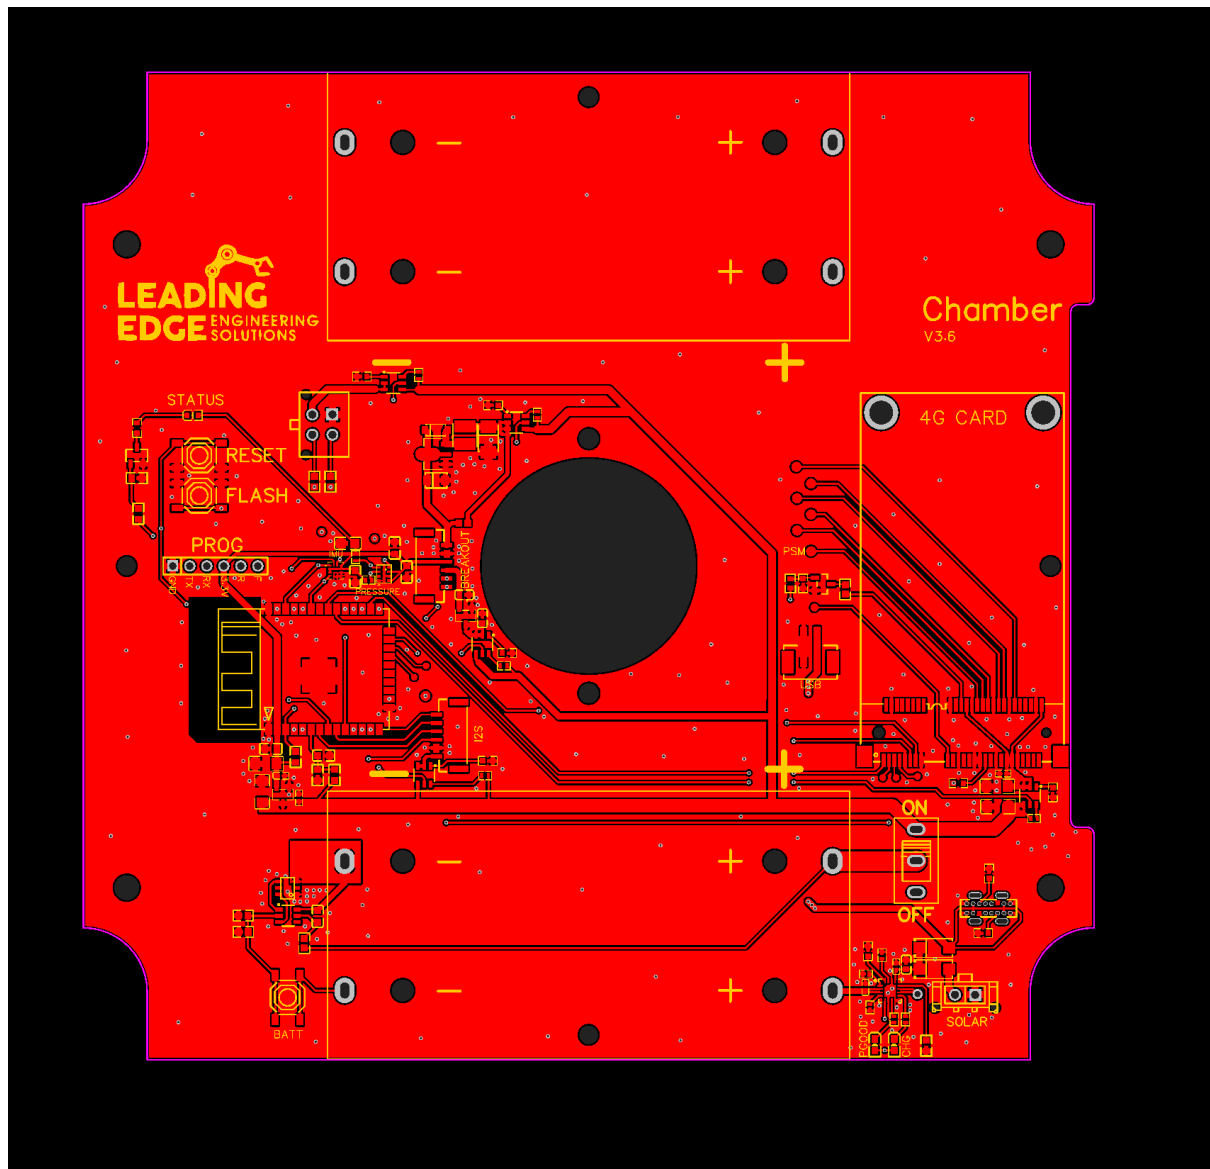

**Figure S3:** Top view of the custom *Pondi* PCB. All components are mounted on this top surface only. Gerber files for the PCB are available upon request.

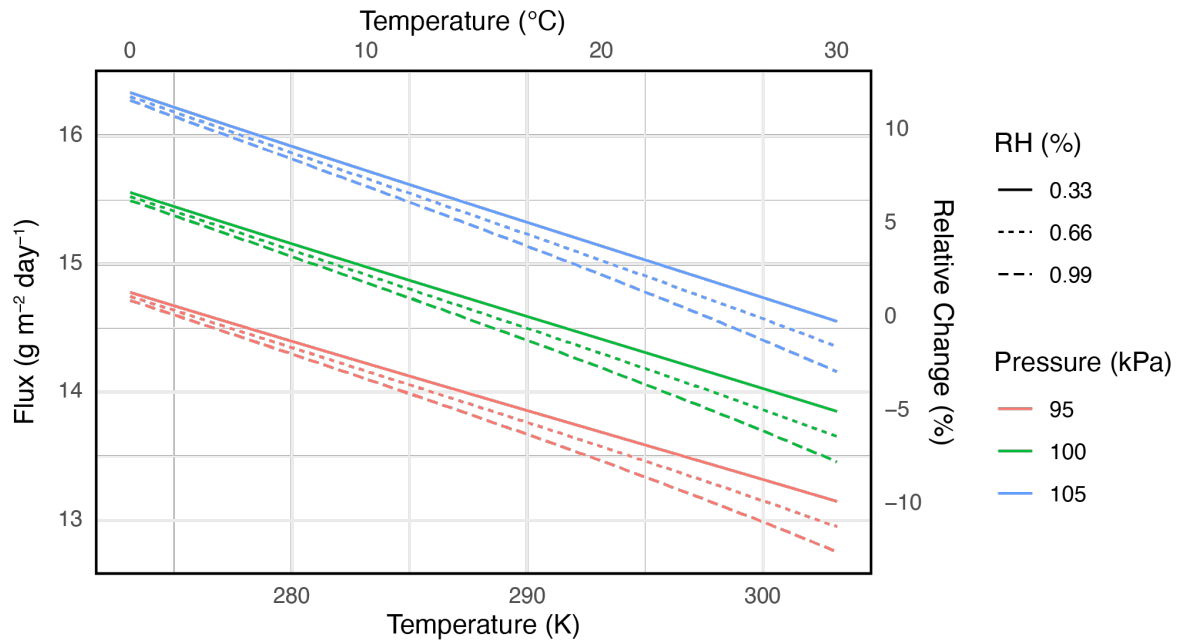

**Figure S4:** Sensitivity of gas flux estimates ( $F_g$ ) to changes in temperature (T), atmospheric pressure (P), and relative humidity (RH). Fluxes were calculated using Equation 1, with all variables held constant except for the one being tested. We simulated a 30  $^{\circ}\text{C}$  change in temperature, a  $\pm 5$  kPa change in atmospheric pressure, and a shift in relative humidity from 33% to 99%. Results show that increasing temperature or decreasing pressure leads to higher flux estimates, while increasing relative humidity slightly reduces fluxes.

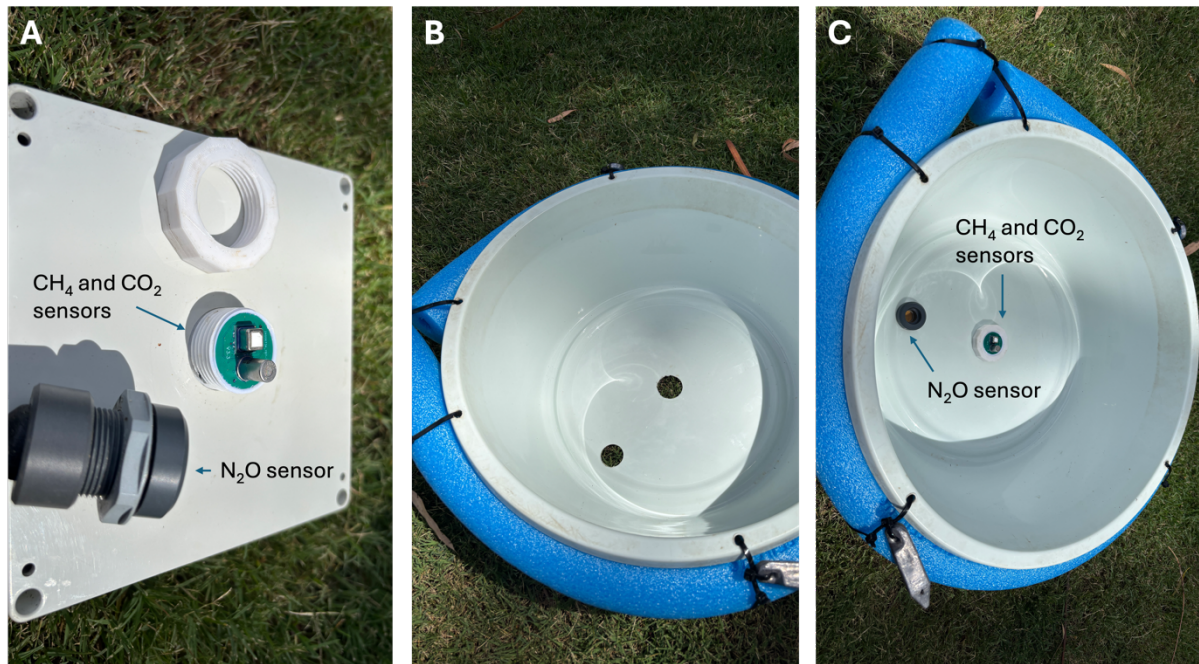

25

26

27 **Figure S5:** Sealing the *Pondi* to the plastic chamber. (A) The threaded connections of the *Pondi*, showing the CH<sub>4</sub>  
28 and CO<sub>2</sub> sensors secured with a plastic screw and O-ring, and the N<sub>2</sub>O sensor with its dedicated threaded housing  
29 for a leak-proof connection. (B) The plastic chamber with pre-drilled holes designed to align with the positions  
30 of the sensors. (C) The *Pondi* installed on the plastic chamber, demonstrating the fully sealed setup with both the  
31 CH<sub>4</sub> and CO<sub>2</sub> sensors and the N<sub>2</sub>O sensor properly secured to prevent gas leakage during flux measurements. The  
32 floating design with foam and weights ensures stability during aquatic deployments.

33

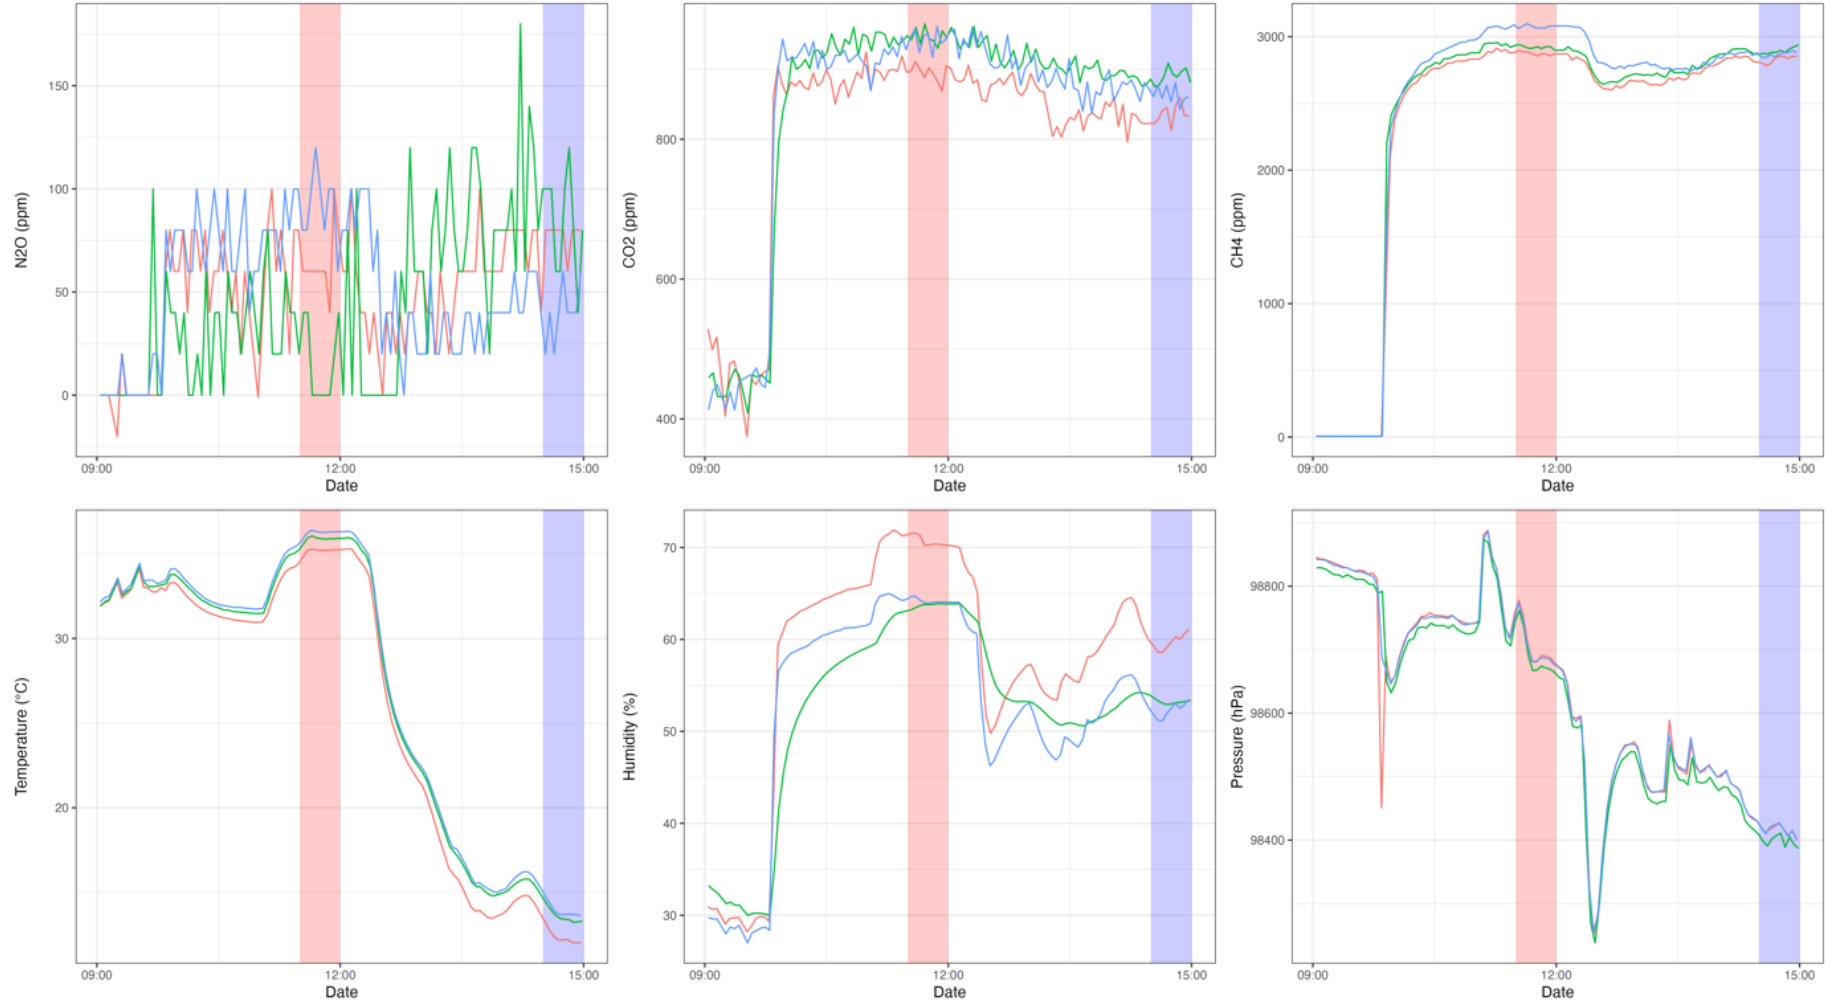

**Figure S6:** Impact of environmental conditions on gas sensor readings as three *Pondi* (coloured lines) transitioned from hot and humid (36°C, 75%) to cold and dry (15°C, 50%) conditions. Shaded areas indicate periods when the system reached equilibrium: red for hot and humid conditions, blue for cold and dry conditions. Refer to Figs. 4 and S7 for mean values and confidence intervals calculated from equilibrium data in these conditions.

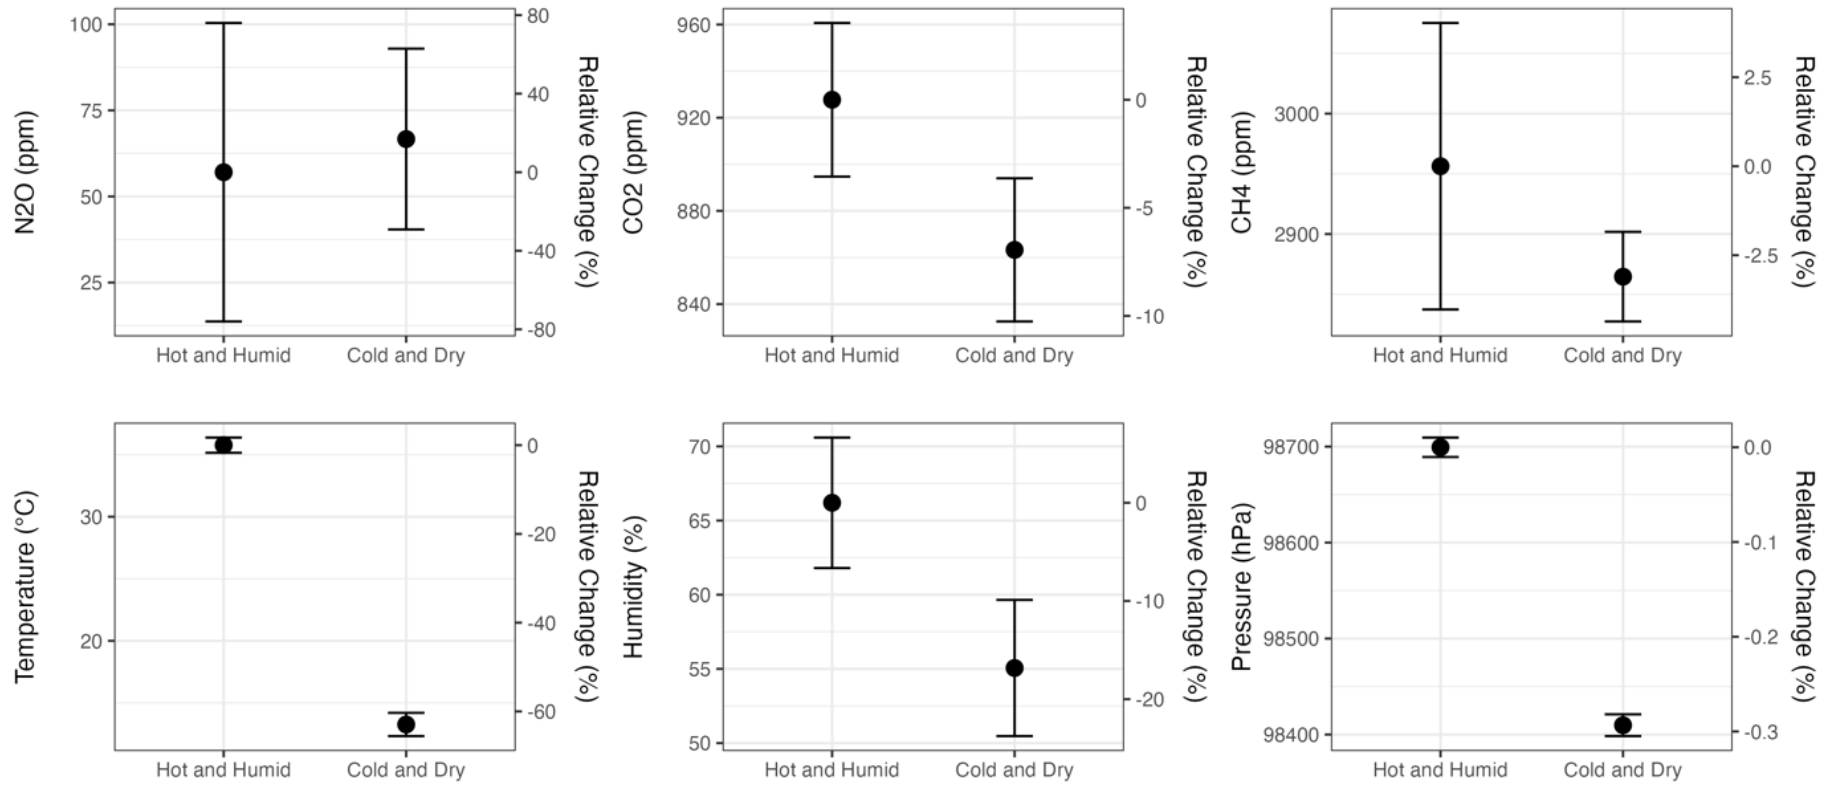

**Figure S7:** Impact of environmental conditions on gas sensor readings, comparing hot and humid conditions (36°C, 75%) with cold and dry conditions (15°C, 50% RH). Means and confidence intervals are based on data from three *Pondi* units after reaching equilibrium. Refer to Fig. S6 for a detailed time series of all measured parameters during the trial.



**Table S1:** List of the primary components used in the construction of the *Pondi*. It includes both core and optional parts. The approximate cost of the components for a *Pondi* is US\$ 750 (or AU\$ 1,166) and requires around six hours of specialised labour to assemble. “Component”: Major subsystem or category of parts (e.g., Enclosure, Solar, Sensors). “Description”: A brief explanation of the role of each component within the system. “Sub-Component”: Specific item within the component group. “Units per Device”: Number of units of that item required for the construction of one *Pondi* unit. “Manufacturer”: The company or brand providing the component. Generic items indicate cases where the brand is unimportant. Custom-designed parts (e.g., 3D-printed sensor mounts) were produced by Leading Edge Engineering Solutions (LEES). Items marked as optional (e.g., N<sub>2</sub>O sensor, external solar panel) can be omitted to reduce cost or power demand, depending on deployment context.

| Component            | Description                                                                                                                                                                                                    | Sub-Component                               | Units per Device | Manufacturer                                              |
|----------------------|----------------------------------------------------------------------------------------------------------------------------------------------------------------------------------------------------------------|---------------------------------------------|------------------|-----------------------------------------------------------|
| Enclosure & Mounting | Protects the internal electronics and sensors from environmental exposure. Provides a secure housing and mechanical structure for field deployment, including mounting points for floating or terrestrial use. | Enclosure                                   | 1                | Hammond Manufacturing, 1555RGY                            |
|                      |                                                                                                                                                                                                                | Vent                                        | 1                | Amphenol LTW, VENT-PS1YGY-O8001                           |
|                      |                                                                                                                                                                                                                | Chamber                                     | 1                | Ezy Storage, 16L Round basin                              |
|                      |                                                                                                                                                                                                                | Pool Noodle                                 | 1                | Generic item                                              |
|                      |                                                                                                                                                                                                                | Zip ties                                    | 7                | Generic item                                              |
|                      |                                                                                                                                                                                                                | Label - waterproof sticker                  | 1                | Generic item                                              |
|                      |                                                                                                                                                                                                                | Foam seal - Enclosure to PCB (internal)     | 1                | LEES custom design                                        |
|                      |                                                                                                                                                                                                                | Foam seal - Enclosure to chamber (External) | 1                | LEES custom design                                        |
|                      |                                                                                                                                                                                                                | USB-C panel mount waterproof socket & cap   | 1                | Waterproof IP68 Type C Female to Male PFC Flat Cable 10cm |
| Solar                | Onboard solar module that recharges the system's battery, enabling long-term autonomous operation without the need for                                                                                         | Panel                                       | 1                | First Solar, 5V 150mA                                     |
|                      |                                                                                                                                                                                                                | Panel adhesive sealant                      | 1                | Generic item                                              |
|                      |                                                                                                                                                                                                                | Micro-Fit 2 Pin Plug                        | 1                | Molex, 0436450200                                         |

|                                    |                                                                                                                                                                                                              |                                                  |   |                                           |
|------------------------------------|--------------------------------------------------------------------------------------------------------------------------------------------------------------------------------------------------------------|--------------------------------------------------|---|-------------------------------------------|
|                                    | external power sources.                                                                                                                                                                                      |                                                  |   |                                           |
| <b>Solar - External (optional)</b> | An optional, larger solar panel for use in shaded environments or when higher energy capacity is needed (e.g., powering active ventilation or telemetry in low-light areas).                                 | External Panel                                   | 1 | Voltaic Systems P126                      |
|                                    |                                                                                                                                                                                                              | External Panel - USB C plug                      | 1 | LEES custom design                        |
|                                    |                                                                                                                                                                                                              | External Panel - Bracket, 1mm aluminium          | 1 | LEES custom design                        |
|                                    |                                                                                                                                                                                                              | External Panel - Double-sided tape               | 1 | LEES custom design                        |
|                                    |                                                                                                                                                                                                              | External Panel - 6mm heat shrink double wall     | 1 | LEES custom design                        |
|                                    |                                                                                                                                                                                                              |                                                  |   |                                           |
| <b>PCBs &amp; Components</b>       | Core electronics, including custom-assembled circuit boards, microcontrollers, data storage, and power management systems that run <i>Pondi's</i> operations, read sensors, and handle logging or telemetry. | PCB - Main                                       | 1 | LEES custom design                        |
|                                    |                                                                                                                                                                                                              | PCB - Breakout                                   | 1 | LEES custom design                        |
|                                    |                                                                                                                                                                                                              | PCB - Antenna                                    | 1 | LEES custom design                        |
|                                    |                                                                                                                                                                                                              | u.Fl cable                                       | 2 | TE Connectivity AMP Connectors, 2410329-2 |
|                                    |                                                                                                                                                                                                              | Battery holders 18650                            | 2 | Generic item                              |
|                                    |                                                                                                                                                                                                              | Battery cells                                    | 4 | INR18650B                                 |
|                                    |                                                                                                                                                                                                              | BG96 mPCI-e                                      | 1 | Quectel, BG96                             |
|                                    |                                                                                                                                                                                                              | mPCIe Standoffs                                  | 2 | Wurth Elektronik, 9774015151R             |
|                                    |                                                                                                                                                                                                              | SIM card (cost of each card before data charges) | 1 | Generic item                              |
|                                    |                                                                                                                                                                                                              | Micro-Fit 2 Pin Socket                           | 1 | Generic item                              |
|                                    |                                                                                                                                                                                                              | 6-pin sensor cable to breakout PCB               | 1 | INR18650B                                 |
| <b>Other Sensors</b>               | Sensors to measure CO <sub>2</sub> , CH <sub>4</sub> , temperature, and humidity, critical for calculating gas fluxes.                                                                                       | Methane (CH <sub>4</sub> )                       | 1 | Figaro TGS2611-E00                        |
|                                    |                                                                                                                                                                                                              | Carbon Dioxide (CO <sub>2</sub> )                | 1 | Sensirion AG, SCD40-D-R2                  |
| <b>Fasteners</b>                   |                                                                                                                                                                                                              | M2.5x4 (mPCIe)                                   | 2 | Generic item                              |

|                                  |                                                                                                                                                                                                            |                       |   |                                   |
|----------------------------------|------------------------------------------------------------------------------------------------------------------------------------------------------------------------------------------------------------|-----------------------|---|-----------------------------------|
|                                  | Includes bolts, nuts, and screws required to assemble the chamber, secure electronics, and mount components within the enclosure.                                                                          | M3x6                  | 4 | Generic item                      |
|                                  |                                                                                                                                                                                                            | M3x12                 | 2 | Generic item                      |
| <b>Printed Parts</b>             | 3D-printed or custom-fabricated parts used to hold sensors, guide airflow, or support other mechanical and structural elements of the system.                                                              | Stem                  | 1 | LEES custom design                |
|                                  |                                                                                                                                                                                                            | nut                   | 1 | LEES custom design                |
|                                  |                                                                                                                                                                                                            | Battery holders       | 2 | LEES custom design                |
|                                  |                                                                                                                                                                                                            | Antenna mount         | 1 | LEES custom design                |
| <b>Other Consumables</b>         | Miscellaneous materials needed for assembly and maintenance, such as adhesives, sealants, tubing, or cable ties, that ensure secure, leak-proof operation.                                                 | Micro-Fit Pins        |   | Generic item                      |
|                                  |                                                                                                                                                                                                            | Filament - ABS (kg)   |   | Generic item                      |
|                                  |                                                                                                                                                                                                            | Conformal coating     |   | Generic item                      |
| <b>N<sub>2</sub>O (optional)</b> | Optional N <sub>2</sub> O sensor and associated components for measuring nitrous oxide fluxes. May be excluded to reduce cost or power demand if only CH <sub>4</sub> and CO <sub>2</sub> are of interest. | N2O Sensor            | 1 | Dynament Platinum P/N2OP/NC/4/P   |
|                                  |                                                                                                                                                                                                            | N2O - PCB             | 1 | Dynament                          |
|                                  |                                                                                                                                                                                                            | N2O - Panel mount     | 1 | Dynament                          |
|                                  |                                                                                                                                                                                                            | N2O - Cable           | 1 | 4-core flexible cable             |
|                                  |                                                                                                                                                                                                            | N2O - 4pin molex plug | 1 | Molex, 0430250400                 |
|                                  |                                                                                                                                                                                                            | N2O - Gland           | 1 | 12mm cable gland                  |
|                                  |                                                                                                                                                                                                            | N2O - Silicon mix     | 1 | MG Chemicals Black Flexible Epoxy |
|                                  |                                                                                                                                                                                                            | N2O - Petroleum jelly |   | Generic item                      |
|                                  |                                                                                                                                                                                                            | Printed mold          | 2 | LEES custom design                |

|                                  |                                                                                                                                                                                   |               |   |                               |
|----------------------------------|-----------------------------------------------------------------------------------------------------------------------------------------------------------------------------------|---------------|---|-------------------------------|
| <b>Active Venting (optional)</b> | An add-on module that includes a small pump and microcontroller for periodically flushing the chamber with ambient air to reset internal gas concentrations between measurements. | Pump          | 1 | Adafruit Industries LLC, 4700 |
|                                  |                                                                                                                                                                                   | Solenoid      | 1 | DFRobot, DFR0866              |
|                                  |                                                                                                                                                                                   | Control PCB   | 1 | LEES custom design            |
|                                  |                                                                                                                                                                                   | Printed frame | 1 | LEES custom design            |
|                                  |                                                                                                                                                                                   | Tubing        | 1 | Generic item                  |
|                                  |                                                                                                                                                                                   | Gland         | 1 | 12mm cable gland              |
|                                  |                                                                                                                                                                                   | Vent          | 1 | 12mm mesh vent                |
|                                  |                                                                                                                                                                                   | Vent O-ring   | 1 | Generic item                  |
